# Supplementary material
Source: Research Square preprint supplement (doi:10.21203/rs.3.rs-9502185/v1)
Supplement: Supplementary file 1 [file f9edc5baa898edcf8ca2e48a.docx]

*Research Article*

Business Impact Analysis for Resilient Pharmaceutical Manufacturing: A Quality and Reliability Framework

Ivana Mitrevska1,2*, Sandra Boshnachki2, Sonja Burcevska2, Elizabeta Karadzinska2, Olivera Paneva2

1Faculty of Medical Sciences, Goce Delcev University, Krste Misirkov, 10A, 2000 Stip, North Macedonia

2 Quality Assurance, Alkaloid AD Skopje, Blvd. A. Makedonski 12, 1000 Skopje, North Macedonia

Correspondence: Email: [ivana.mitrevska@ugd.edu.mk](mailto:ivana.mitrevska@ugd.edu.mk); [i.mickoska@Alkaloid.com.mk](mailto:i.mickoska@Alkaloid.com.mk)

**Table S1:Structured Steps in the BIA Process.**

| **Step** | **Description** | **Key Stakeholders** |
| --- | --- | --- |
| 1. Initiation & Planning | Define scope, objectives, responsibilities | QA, Executive Management |
| 2. Data Collection | Gather information on functions, resources, dependencies | QA, Production, Regulatory, Logistics |
| 3. Risk & Impact Assessment | Analyze vulnerabilities and potential disruptions | QA, Risk Management Team |
| 4. Prioritization of Functions | Apply MTD/RTO to rank critical functions | QA, System Owners |
| 5. Strategy Development | Define mitigation and recovery strategies | QA, Business Continuity Program |
| 6. Validation & Maintenance | Review, test, and update the BIA | QA, Executive Management |

**Table S2:Criticality parameters for core business functions.**

| **Business Function** | **MTD (hours)** | **RTO (hours)** | **WRT (hours)** | **Criticality Level** |
| --- | --- | --- | --- | --- |
| Production | 48 | 24 | 12 | Very High |
| Quality Control (QC/QA) | 72 | 36 | 24 | High |
| Supply Chain & Procurement | 120 | 72 | 48 | High |
| Regulatory Affairs | 168 | 120 | 72 | Moderate |
| Logistics & Distribution | 96 | 48 | 48 | High |
| IT & Data Systems | 48 | 24 | 12 | Very High |

**Explanatory note: Rationale for MTD, RTO and WRT**

We set continuity parameters by triangulating (i) historical downtime and deviation logs, (ii) SME workshops, and (iii) regulatory/technical constraints (e.g., batch-release timelines, cold-chain limits, system restore times). Below are the decision logics used for each function:

- **Production (Manufacturing Operations)**
  **MTD = 48 h; RTO = 24 h; WRT = 12 h.**
  Justification: unplanned stoppages beyond two days create line re-sequencing, upstream WIP risk, and down-stream backlog in QC; short holds risk missing market-supply windows for the finished product. Past stoppages >24 h led to at-risk commitments and urgent re-planning hence a 24 h RTO. WRT 12 h covers restart, clearance, and attainment of nominal run rate.
- **IT & Data Systems**
  **MTD = 48 h; RTO = 24 h; WRT = 12 h.**
  Justification: batch documentation, QMS/LIMS access, and ERP/material traceability are gating for release and shipment. Restore objectives reflect validated backup/restore capabilities and vendor SLAs. Longer outages previously halted release decisions hence alignment with Production tolerances.
- **Quality Control / Quality Assurance (QC/QA)**
  **MTD = 72 h; RTO = 36 h; WRT = 24 h.**
  Justification: QC queues can absorb short delays via shift re-balancing; however, beyond ~3 days, cumulative backlog delays release. RTO 36 h reflects instrument warm-up/qualification and method readiness; WRT 24 h covers sample re-allocation and data review.
- **Logistics & Distribution**
  **MTD = 96 h; RTO = 48 h; WRT = 48 h.**
  Justification: shipping windows and cold-chain capacity provide modest buffering, but lane disruptions beyond four days risk stock-outs downstream. RTO 48 h matches alternative carrier activation and route re-booking lead times; WRT covers re-labeling and re-documentation.
- **Supply Chain & Procurement**
  **MTD = 120 h; RTO = 72 h; WRT = 48 h.**
  Justification: safety stocks and dual sourcing reduce immediacy; however, API/excipient delays beyond five days trigger production rescheduling. RTO 72 h aligns with emergency purchase channels and supplier escalation protocols; WRT handles quality re-approval and incoming inspection re-slotting.
- **Regulatory Affairs**
  **MTD = 168 h; RTO = 120 h; WRT = 72 h.**
  Justification: dossier tasks operate on longer cycles; short delays are absorbable, but prolonged inactivity escalates market-access risks. RTO 120 h reflects resource reallocation and re-prioritization; WRT covers document harmonization and internal approvals

**Table S3**:**FMEA risk analysis of critical business functions.**

| **Business Function** | **Failure Mode** | **Effect** | **Severity** | **Occurrence** | **Detection** | **RPN** |
| --- | --- | --- | --- | --- | --- | --- |
| Production | Equipment breakdown | Halted manufacturing, product delays | 9 | 6 | 4 | 216 |
| Quality Control | Analytical deviation | Invalid results, release delays | 8 | 5 | 5 | 200 |
| Supply Chain | API shortage | Production stoppage, unmet demand | 9 | 4 | 6 | 216 |
| Regulatory Affairs | Delayed submission | Market disruption, non-compliance | 7 | 3 | 6 | 126 |
| Logistics | Cold-chain failure | Compromised product quality | 8 | 4 | 5 | 160 |
| IT & Data Systems | System downtime | Data loss, release blockage | 9 | 5 | 7 | 315 |

# **Explanatory note**

# **Function:** IT & Data Systems

# **Failure mode:** Database server outage during batch-release documentation review

# **Effects:** Release blockage; potential data integrity deviation; production queues build

# **Pre-mitigation scoring:** S = 9 (release stoppage & compliance risk), O = 5 (about once/1–2 years), D = 7 (limited predictive monitoring)

# **RPN (baseline):** 9 × 5 × 7 = 315 (Priority 1)

**Addendum: FMEA scales, thresholds**

**Scoring scales (1–10) used in the FMEA**

- **Severity (S)** - effect on patient supply, GxP compliance, and financial/reputational impact
  1 = negligible; 3 = minor (local rework, no delay); 5 = moderate (one-day slip, contained deviation);
  7 = major (multi-day delay, batch on hold, CAPA required); 10 = critical (market disruption, potential shortage, regulatory action).
- **Occurrence (O)** - expected frequency (based on logs + SME judgment)
  1 = ≤ once in 10 years; 3 = once in 5–10 years; 5 = once in 1–2 years;
  7 = several times per year; 10 = monthly/continuous.
- **Detection (D)** - likelihood to detect the failure mode before impact
  1 = almost certain detection (real-time alarms with auto-interlocks);
  3 = strong controls (validated alarms, routine checks);
  5 = partial/indirect detection (periodic reviews);
  7 = weak/lagging indicators (manual discovery);
  10 = no detection until impact occurs.

**Priority thresholds and required actions**

- **Priority 1 (High): RPN ≥ 200**
  Immediate action owner; mitigation plan approved by Steering Committee; due ≤ 30–60 days; verify effectiveness after implementation.
- **Priority 2 (Medium): RPN 125–199**
  Action plan within 90 days; integrate into preventive maintenance / supplier quality and monitor trend.
- **Priority 3 (Low): RPN < 125**
  Monitor via KPIs; reassess at next BIA/management review or after significant change.

*Note:* RPN = **S × O × D**. Where two risks have similar RPNs, the higher **S** (severity) is prioritized.
